# Supplementary material
Source: publisher figshare collection journal article supplement (https://wiley.figshare.com/articles/dataset/_/3514535)
Supplement: Supplementary file 2 [file 1 › appendix-C.htm]

Ecological Archives A019-072-A3


### *Ecological Archives* A019-072-A3

### **Stephen C. Newbold and Juha V. Siikamäki. 2009. Prioritizing conservation activities using reserve site selection methods and population viability analysis. *Ecological Applications* 19:1774–1790.**

Appendix C. Ricker results: table with parameter estimates and baseline persistence probabilities based on a Ricker stock–recruitment model, analagous to Table 1 based on a Beverton-Holt stock–recruitment model.

> View / download PDF.

---


[Back to A019-072]
